# Supplementary material for: Correlative action of radiation and bleomycin on the solid tumor hepatoma ascites AH109A
Source: Royal Society of Chemistry journal article supplement (doi:10.1039/c4nr07579j), 1973-07-01
Supplement: c4nr07579j1.pdf [file c4nr07579j1.pdf]

## Supporting Information

### **A plasmonic nanosensor for lipase based on enzyme- controlled gold nanoparticles growth in situ**

Yan Tang,<sup>a</sup> Wei Zhang,<sup>a</sup> Jia Liu,<sup>a</sup> Lei Zhang,<sup>b</sup> Wei Huang,<sup>c</sup> Fengwei Huo,<sup>d</sup> and Danbi Tian\*<sup>a</sup>

<sup>a</sup> College of science, Nanjing Tech University, Nanjing 211816, China. E-mail: danbi@njtech.edu.cn.

<sup>b</sup> Key Laboratory for Organic Electronics and Information Displays & Institute of Advanced Materials (IAM), National Synergistic Innovation Center for Advanced Materials (SICAM), Nanjing University of Posts & Telecommunications, 9 Wenyuan Road, Nanjing 210023, China.

<sup>c</sup> Key Laboratory of Flexible Electronics (KLOFE) & Institute of Advanced Materials (IAM), National Synergistic Innovation Center for Advanced Materials (SICAM), Nanjing Tech University (NanjingTech), 30 South Puzhu Road, Nanjing 211816, China.

<sup>d</sup> School of Materials Science and Engineering, Nan yang Technological University, 50 Nan yang Avenue, Singapore 639798, Singapore.

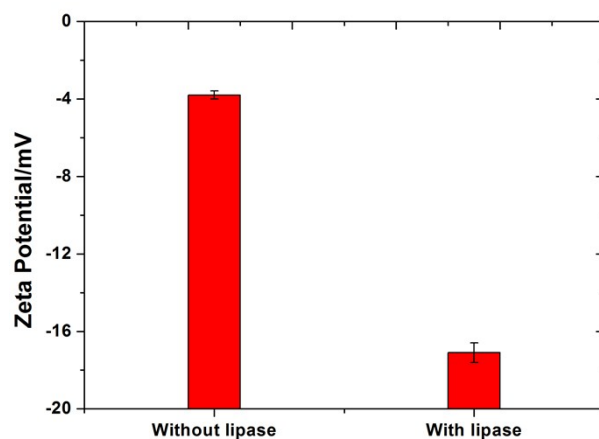

**Fig. S1** Comparison of the zeta potentials in response to the AuNPs in the absence and presence of 2 mg lipase.

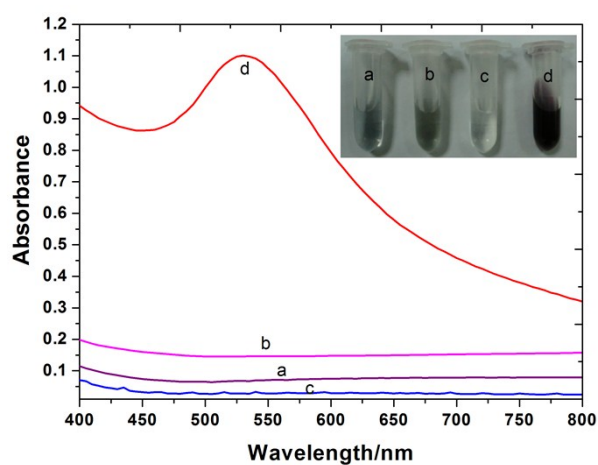

**Fig. S2** Absorption spectra and photographs (inset) of solution: (a) Tween 20 + HAuCl<sub>4</sub> (b) Tween 40 + HAuCl<sub>4</sub> (c) Tween 60 + HAuCl<sub>4</sub> (d) Tween 80 + HAuCl<sub>4</sub>.

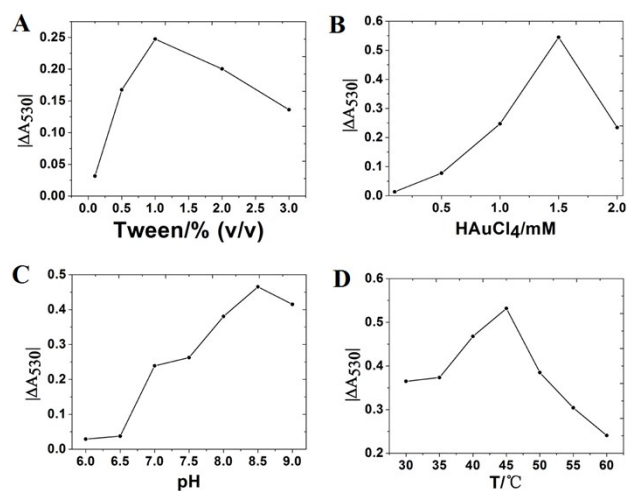

**Fig. S3** Changes in absorbance at 530 nm as a function of (A) Tween 80 and (B)  $\text{HAuCl}_4$  concentration; Effects of (C) pH and (D) temperature on lipase activity. All assays were performed with  $2 \text{ mg mL}^{-1}$  lipase.

**Table S1** Use of Tween 80 as substrate in pH-stat method for detecting the hydrolytic activity of commercial lipases. All assays were performed with  $2 \text{ mg mL}^{-1}$  lipase at  $45 \text{ }^\circ\text{C}$  and pH 8.5 for 10 min.

| Lipase                                 | SBE-01Li | RNL    | PPL    | CRL    |
|----------------------------------------|----------|--------|--------|--------|
| Volume of NaOH consumed (mL)           | 0.16     | 0.88   | 1.55   | 2.89   |
| Lipase activity ( $\text{U mL}^{-1}$ ) | 0.07718  | 0.4245 | 0.7477 | 1.3941 |
